# Supplementary material
Source: PubMed Central journal article supplement (PMC5061079)
Supplement: NIHMS66334-supplement-Supplementary_Information.pdf [file NIHMS66334-supplement-Supplementary_Information.pdf]

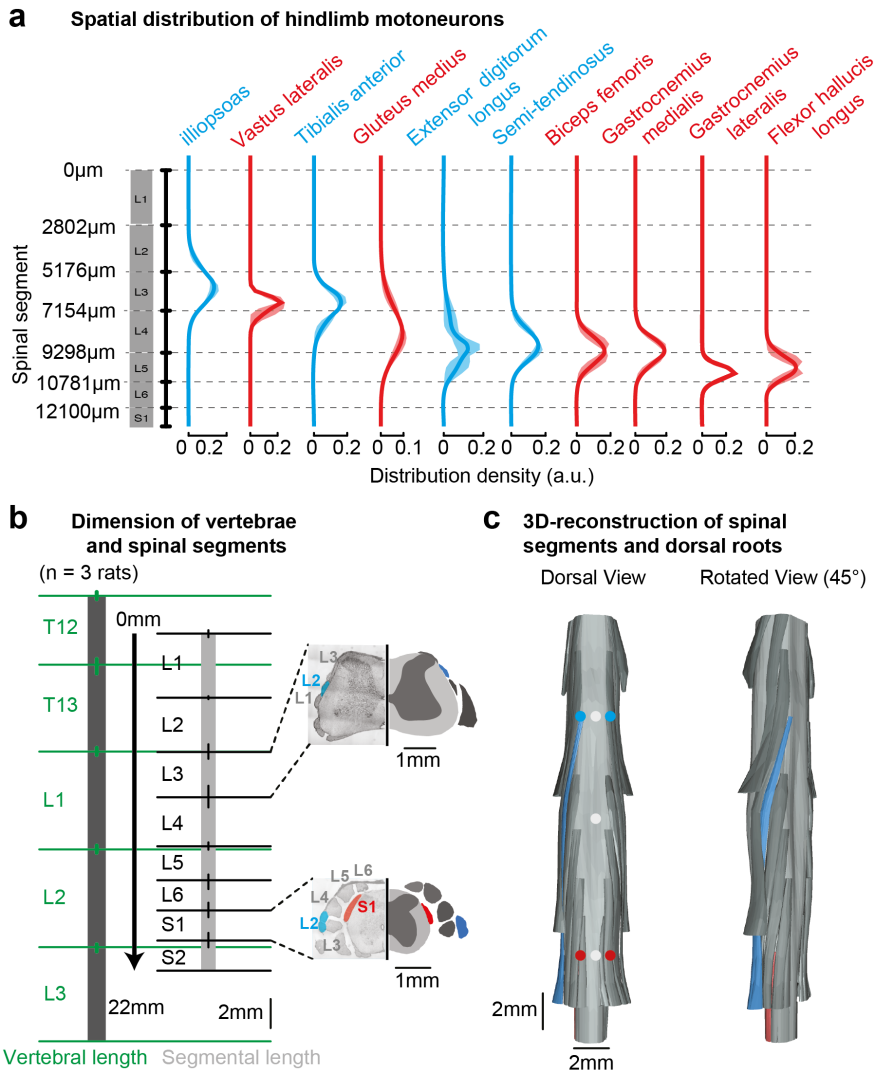

**Supplementary Figure 1: Spatial distribution of hindlimb motoneurons and 3D reconstruction of vertebrae, spinal cord and dorsal roots in Lewis rats**

(a) Plots reporting the relative spatial distribution of motoneuron density along the rostrocaudal extent of lumbosacral segments for each traced muscle. Each distribution is the average ( $\pm$  SEM) of motoneuron densities calculated for 2 to 3 rats per muscle. The density is normalized to the total number of detected motoneurons for each muscle and rat, which corresponds to 1. (b) Quantification of the length of vertebra T12 to L3–L4, and of spinal segments L1 to S1 in three rats. The vertical bars on each diagram indicate the standard deviation of measurements across rats. The photographs show coronal views of the entire half of the spinal cord, including the dura mater, dorsal roots, and spinal tissue. The complementary views show camera Lucida reconstructions of the white and grey matter, and of the dorsal roots. Coronal sections were extracted from spinal segments L3 and S1. The dorsal roots projecting to L2 and S1 spinal segments are color-coded to visualize their respective location. (c) 3D reconstruction of the entire lumbosacral spinal cord and dorsal roots. The dorsal roots innervating L2 and S1 spinal segments are color-coded to help visualizing their respective spatial trajectory. The 3D reconstructions are displayed from a dorsal view, and from a view that is rotated by 45° leftward around the rostrocaudal axis in order to visualize the trajectory of the dorsal roots along spinal segments. The color-coded dots indicate the locations of electrodes targeting extensor and flexor hotspots through the recruitment of dorsal roots.

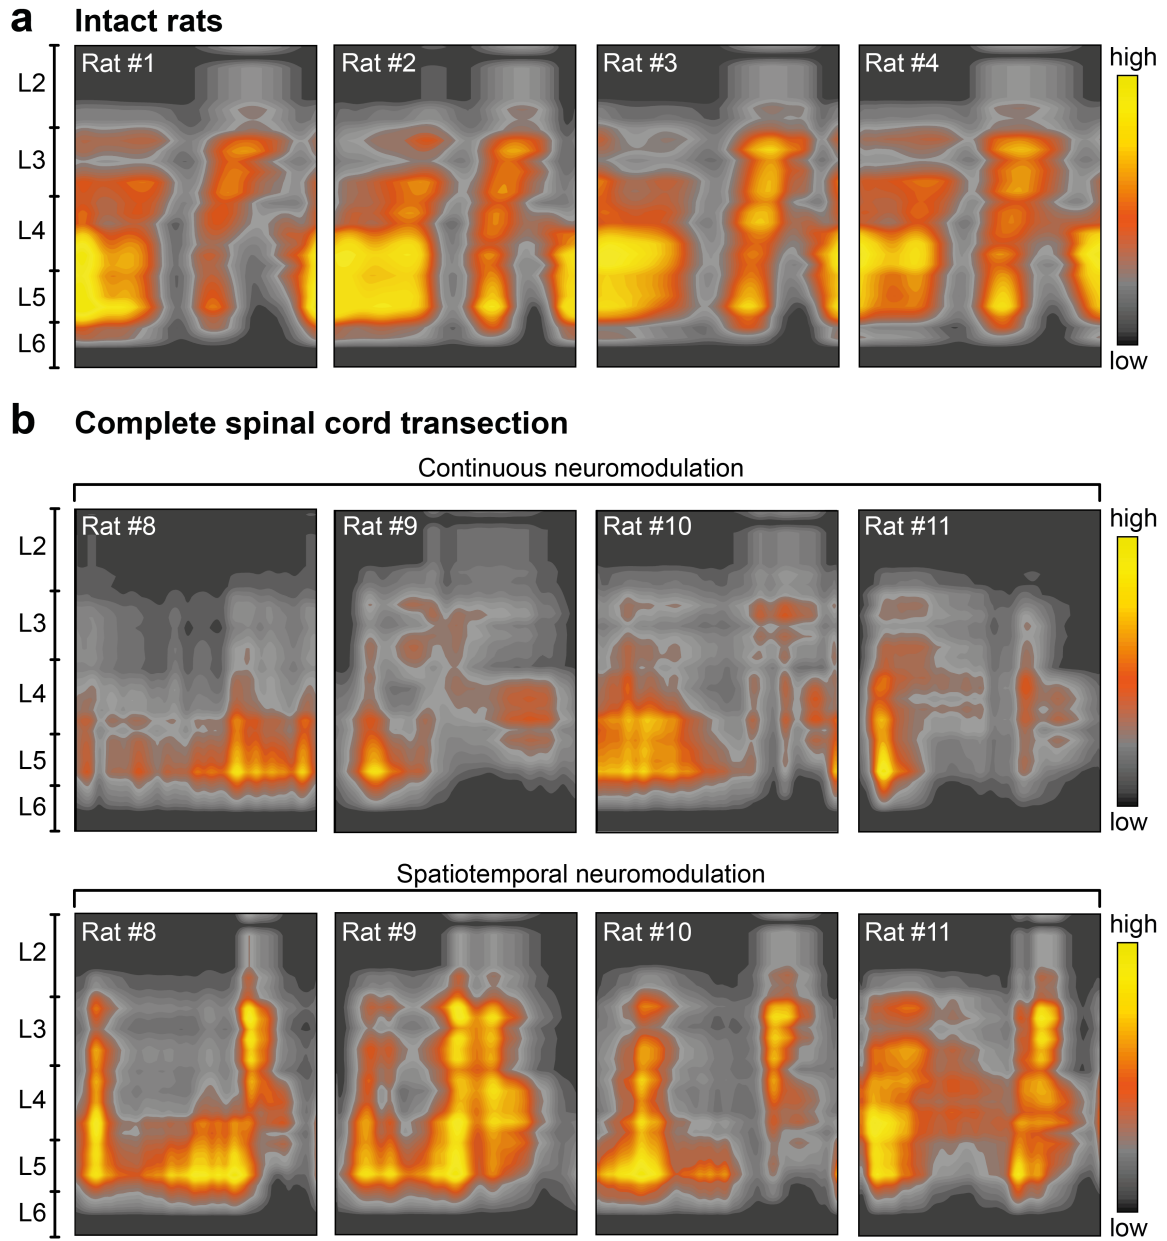

**Supplementary Figure 2: Spatiotemporal maps of motoneuron activation**

(a) Spatiotemporal map of motoneuron activation recorded in four intact rats. (b) Spatiotemporal map of motoneuron activation recorded in four rats with complete SCI during continuous versus spatiotemporal neuromodulation.

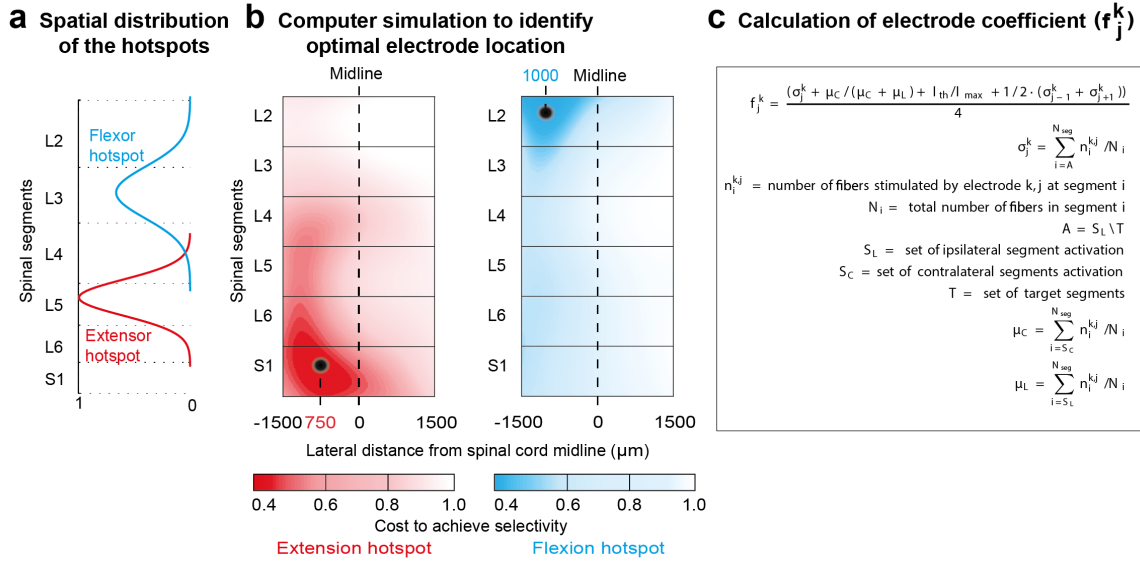

**Supplementary Figure 3: Computer simulations to identify optimal electrode locations to target extensor versus flexor hotspots**

(a) Spatial distribution of extensor and flexor motoneuron activation profiles along the rostrocaudal extent of lumbar segments. The spatial distribution was extracted using a Gaussian clustering algorithm applied on spatiotemporal maps of motoneuron activation during gait (Fig. 1a). (b) Equations describing the optimization algorithm that calculated the cost to activate a given spinal segment, while minimizing activation of other segments. The cost function combined four optimization factors: (i) stimulation specificity for the targeted segments; (ii) ipsilateral vs. contralateral specificity; (iii) minimum threshold; and (iv) specificity of neighboring sites. The targeted activation of each segment was defined by the spatial distribution of extensor- and flexor-related motoneuron activation profiles displayed in (a). The color-coded maps report the computed cost to preferentially activate extensor versus flexor hotspots on one side of the spinal cord. Implants were designed with electrodes located at the mediolateral and rostrocaudal positions where the cost reached a local minimum, as highlighted by the black circles.

**a Design and fabrication of spatially selective spinal implants**

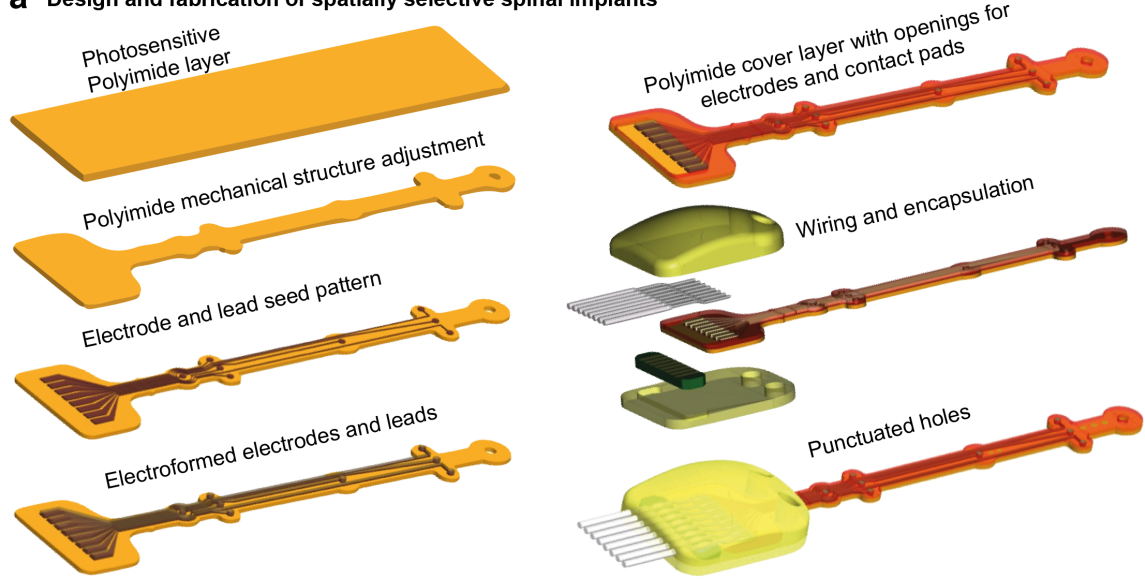

**b Mask layout**

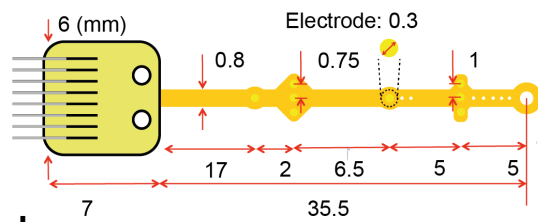

**c Final spinal implant with connector**

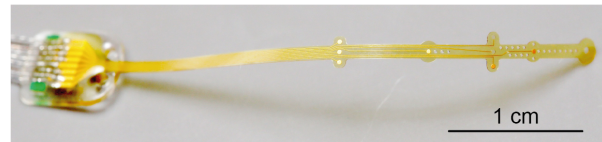

**d Surgical implantation**

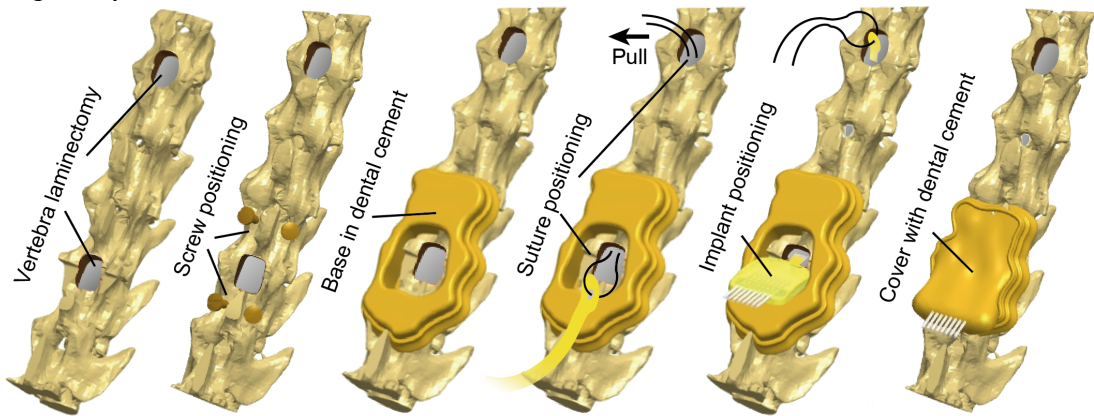

**Vertebral orthosis for epidural implantation in rat**

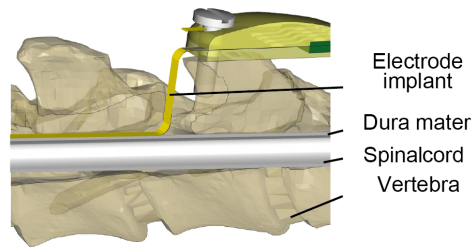

#### **Supplementary Figure 4: Design, fabrication and surgical procedures of spatially selective spinal implants**

(a) Processing starts with deposition of a 20  $\mu\text{m}$  thick Polyimide film by spin coating on the silicon substrate. The Polyimide-based bottom layer constituting the footprint of the implant is realized through ultra-violet lithography. A 200 nm thick gold layer is deposited using vacuum evaporation and lithographically structured to create a conductive seed pattern. An additional gold layer is electroplated to a height of approximately 6  $\mu\text{m}$  to create the electrodes and interconnects. A 20  $\mu\text{m}$  cover layer of photosensitive Polyimide is then applied by spin coating to uniformly cover the bottom and electrode structure. A final ultra-violet lithography is applied to structure the top layer of the implant, and to create openings over the electrodes and contact pads. The implants are gently released from the carrier wafer. To create a connector, the contact pads located at the extremity of the implant are glued to a small support plate made of medical grade PMMA sheet material. Precision milled alignment structures allow fine adjustment of the support plate to the polyimide-based spinal implant, and to the extremity of the leads. The support plate contained a seat in which a tiny printed circuit board (PCB) with conductive stripes is fixed. Stainless steel leads with silicone rubber insulation are directly soldered to the contact pads of the implant via the contact stripes located on the PCB. The resulting implants and connective leads were highly reliable mechanically and electrically. Finally, the entire contact area was covered with a ultra-violet curable, methacrylate-based resin that provides tight sealing. For improved bio-integration, the contact interface is over-moulded with a thin layer of medical grade silicone. (b) Electrode layout and dimensions (mm) of the implants. (c) Photograph showing the final fabrication of the spinal implants. (d) Under sterile conditions, a dorsal midline skin incision was made and the muscles covering the dorsal vertebral column were removed. A partial laminectomy was made at vertebrae levels L3–L4 in rats and L4–L5 in monkeys, and at vertebrae T12–T13 to create entry and exit points for the implant. In rats and mice, four micro-screws were then inserted into the bone of vertebrae L4 and L5, at the entry points of the laminectomy. Surgical suture was used to form walls around the micro-screws. The walls were plastered using freshly mixed dental cement, which formed a vertebral fixation structure and protective cage for the spinal implant. A surgical suture (Ethilon 4.0) was folded to form a loop that was inserted through the rostral (T12–T13) laminectomy (above or below the dura mater), and pushed horizontally along the epidural space until the loop emerged through the caudal (L4 or L5) opening. The suture was passed through a hole created at the extremity of the Polyimide-based spinal implant. The loop was gently retracted to position the implant over the desired spinal cord location. A small portion of the implant protruded outside the spinal canal. Using fine-forceps, the extremity of the implant was displaced along the mediolateral and rostrocaudal directions to fine-tune its positioning. For this, single pulses were delivered through the electrodes targeting extensor and flexor hotspots. The mediolateral position of the implant was adjusted to obtain unilateral motor responses with both sets of lateral electrodes. The rostrocaudal position of the implant was adjusted to obtain selective movement of ankle extension and hip flexion with electrodes targeting extensor versus flexion hotspots, respectively. For fine positioning, we also monitored motor evoked potentials in an ankle extensor muscle and a hip flexor muscle of the left and right hindlimbs. The connector was positioned within the cage and an additional layer of dental cement was added to close the vertebral fixation structure. The Teflon-insulated stainless steel wires soldered to the connector were routed subcutaneously to the head of the rat. The wires were soldered to an Omnetics electrical connector that was secured to the skull using dental cement.

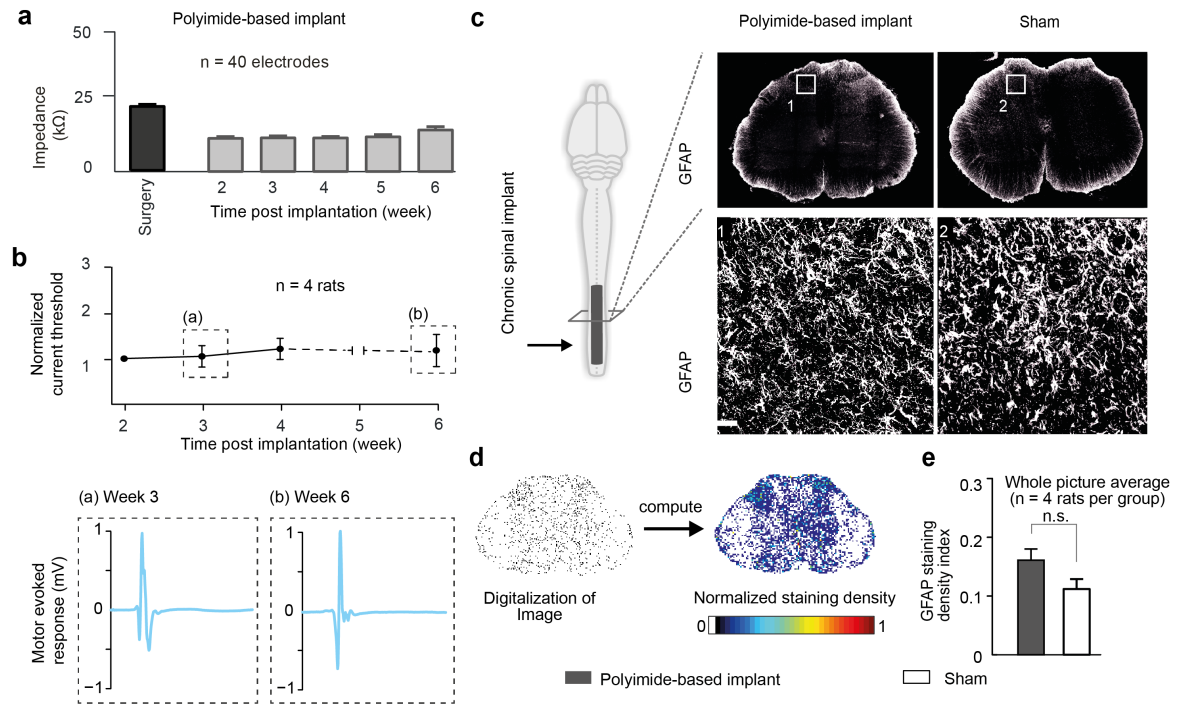

### Supplementary Figure 5: Long-term functionality and bio-integration of epidural spinal implants

(a) Histogram plots reporting changes in the mean values of electrode impedance of polyimide-based epidural spinal implants in rats. The impedance was measured for all the electrodes of the implants in the same rats during the surgical implantation, and on a weekly basis during the subsequent weeks. (b) Plots reporting the normalized current threshold necessary to elicit motor evoked responses in the tibialis anterior muscle with a single pulse of electrical stimulation (0.5 ms, 0.1 Hz) delivered through the same electrode over several weeks post implantation. Measurements could not be obtained on week 5 due to technical problems. The windows display motor evoked responses recorded in the tibialis anterior muscle at week 3 and week 6 post-implantation when delivering stimulation at 150  $\mu$ A through the same electrode of the spinal implant. (c) Rats ( $n = 4$  per group) were sacrificed 8 weeks after the surgical insertion of Polyimide-based spinal implants over the epidural surface of lumbosacral segments. Representative confocal images of the L4 spinal segment (middle of implant) stained for the neuro-inflammatory marker GFAP (reactive astrocytes) are shown for the implanted and sham rats. Scale bars, 500  $\mu$ m and 40  $\mu$ m for the overviews and insets, respectively. (d) Images were digitalized, color-filtered, and binarized by means of an intensity threshold that was maintained constant across sections and rats. Images were divided into square regions of interest (ROI), and GFAP densities were computed within each ROI. (e) Histogram plots reporting the mean and SEM values of computed GFAP density for rats with spinal implants and sham rats. Spinal implants had a negligible impact on the inflammatory environment of spinal tissue located underneath the implant. n.s. = non-significant.

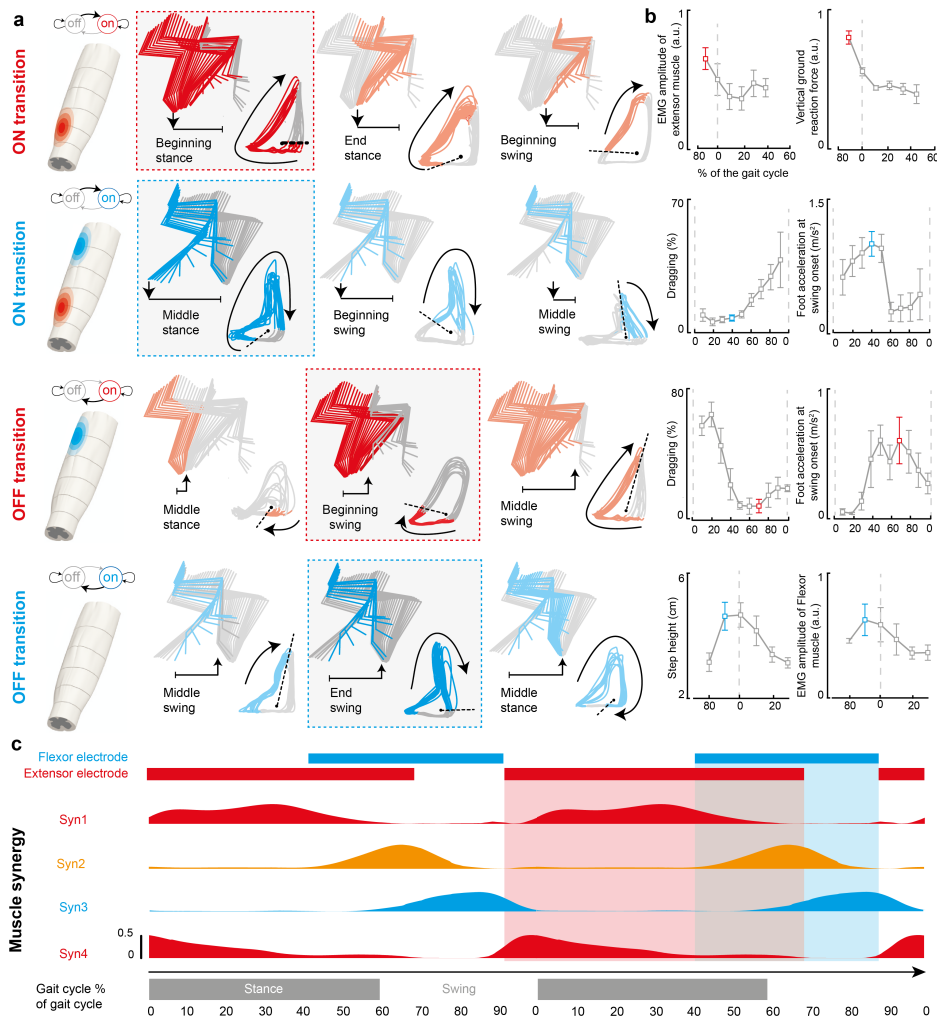

### Supplementary Figure 6: Experiments to identify optimal temporal structure

(a) Experiments were performed in rats with complete SCI. A serotonergic replacement therapy was administered 10 min prior to experiments. Rats stepped bipedally on a treadmill while neuromodulation (40 Hz, 0.2 ms, 100–200  $\mu$ A) was delivered through the electrodes targeting extensor versus flexor hotspots on one side. The spinal cord diagrams illustrate the intended activation or inactivation of a given hotspot. The lines with an arrowhead indicate the onset (beginning of line) and end (arrowhead) of the stimulation. The arrowhead highlights the timing of the transition between states represented in each panel. A stick diagram decomposition of hindlimb movements during a complete gait cycle is displayed for three selected triggering times per transition state. The successive ( $n = 10$  steps) trajectories of the hindlimb endpoint are also reported. Both stick diagrams and hindlimb endpoint trajectories are colored when the state of the tested electrode is ON. The dotted line indicates the angular value that triggered the transition between ON–OFF states, reported as percent of the gait cycle duration. The shaded background highlights the optimal triggering time, defined from combinations of parameters (see **Methods**). (b) Plots reporting the mean values (10 steps per data point,  $n = 5$  rats) of relevant gait parameters related to extension or flexion across the entire range of tested triggering times. For each rat, the normalized gait cycle duration was divided into 10 bins of equal durations, reported along the x-axis as percent of cycle duration. The triggering times leading to optimal gait parameters are colored in red and blue for electrodes targeting extensor and flexor hotspots, respectively. (c) Diagram reporting the optimal temporal structure to deliver stimulation through the electrodes targeting extensor versus flexor hotspots in order to facilitate locomotion. The temporal activation profiles of muscle synergies are displayed at the bottom to emphasize the coincidence between the optimal temporal structure of stimulation and the activation of muscle synergies. Note that the optimal temporal structure involved co-activation of electrodes targeting the extensor and flexor hotspots at the stance to swing transition, which coincided with the activation of synergy 2 combining extensor and flexor motoneurons (see **Fig. 1**). The lower bar indicates the division of gait into bins of equal durations that defined the timing to trigger events.

**a Muscle activity during locomotion under different neuromodulation conditions**

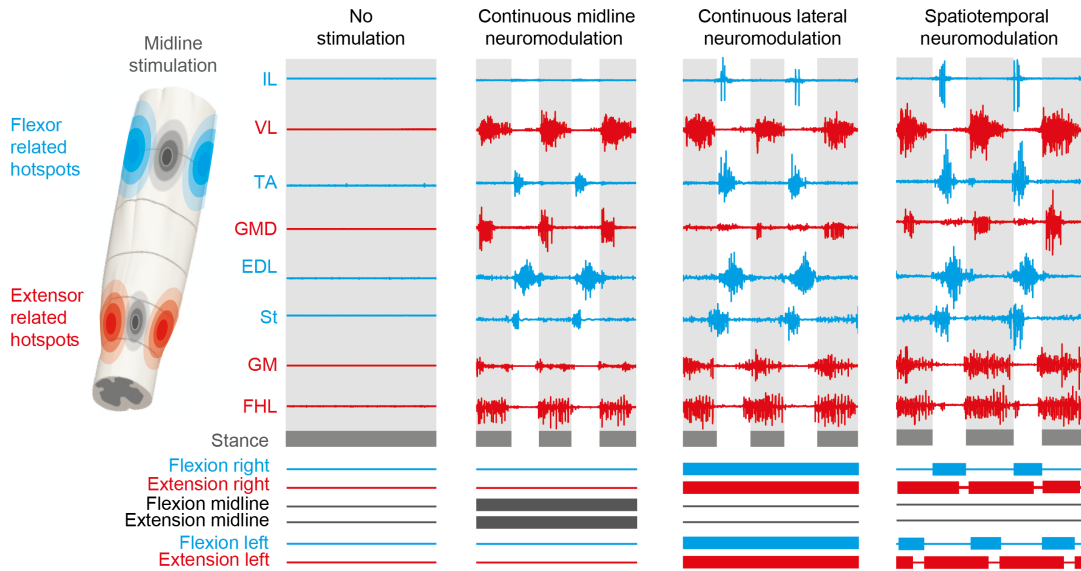

**b Quantification of muscle activity**

Modulation of flexor muscles

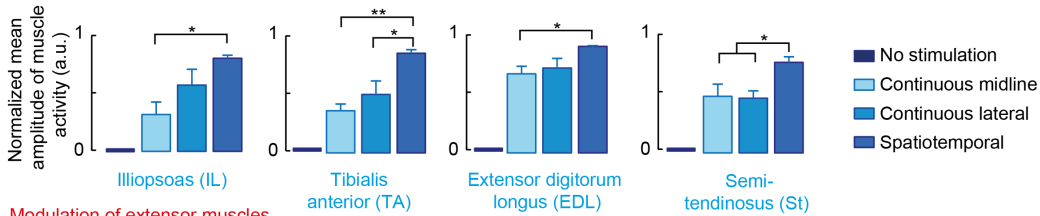

Modulation of extensor muscles

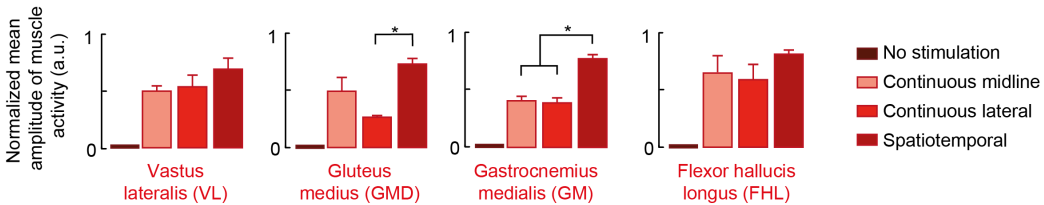

**Supplementary Figure 7: Changes in hindlimb muscle activity across conditions of neuromodulation**

(a) Electromyographic activity recorded from pairs of antagonist muscles spanning each hindlimb joint without stimulation (paralysis), during locomotion under continuous neuromodulation applied over the midline of lumbar and sacral segments, during continuous neuromodulation delivered through all the four lateral electrodes targeting extensor and flexor hotspots on the left and right sides, and during spatiotemporal neuromodulation through the lateral electrodes using the temporal structure identified in **Supplementary Fig. 6**. The recordings were obtained on the same day. The horizontal bars at the bottom (blue, red, black) indicate the On/Off state of each electrode, which is controlled in real-time. Experimental conditions and conventions are the same as in **Fig. 4**. (b) Histogram plots reporting the mean ( $n = 4$  rats, except  $n = 5$  rats for MG and TA muscles) amplitude of each muscle burst during each experimental condition. The mean amplitude of EMG activity was normalized to the maximum value recorded during locomotion in each rat. \*,  $P < 0.05$ ; \*\*,  $P < 0.01$ .



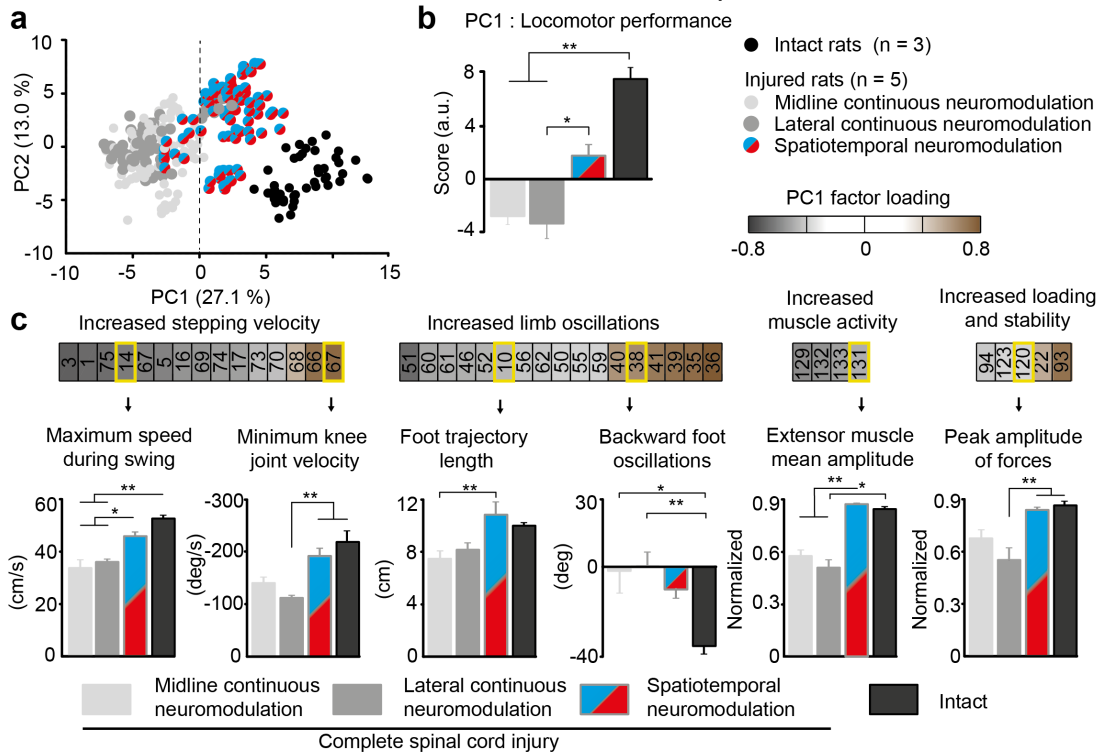

### Supplementary Figure 8: Quantification of gait patterns in rats with complete SCI

(a) A total of 137 parameters providing comprehensive gait quantification (**Supplementary Table 1**) were computed from kinematic, kinetic, and muscle activity recordings. Principal component (PC) analysis was applied on all the computed parameters for all the gait cycles under each experimental condition. Experimental conditions are the same as in **Fig. 4**. The analyzed gait cycles are represented by individual dots in the new 2D space created by PC1-2, which explained more than 40 % of the total data variance. The histogram plots report the mean values of scores on PC1, which quantified the degree of difference between gait patterns of intact and injured rats during locomotion under the various experimental conditions. Scores on PC1 are thus related to locomotor performance. This analysis demonstrated significant improvement of locomotor performance during spatiotemporal neuromodulation compared to continuous neuromodulation applied over the midline, or through lateral electrodes targeting extensor versus flexor hotspots. (b) To identify the specific features that improved during spatiotemporal neuromodulation, the parameters correlating with PC1 (factor loadings) were extracted and regrouped them into functional clusters, which are named for clarity. The numbers refer to parameters described in **Supplementary Table 1**. (c) The histogram plots report the mean ( $n = 5$  rats) values of parameters with high factor loadings on PC1 for each of the identified functional clusters. Error bars, SEM. \*,  $P < 0.05$ ; \*\*,  $P < 0.01$ .

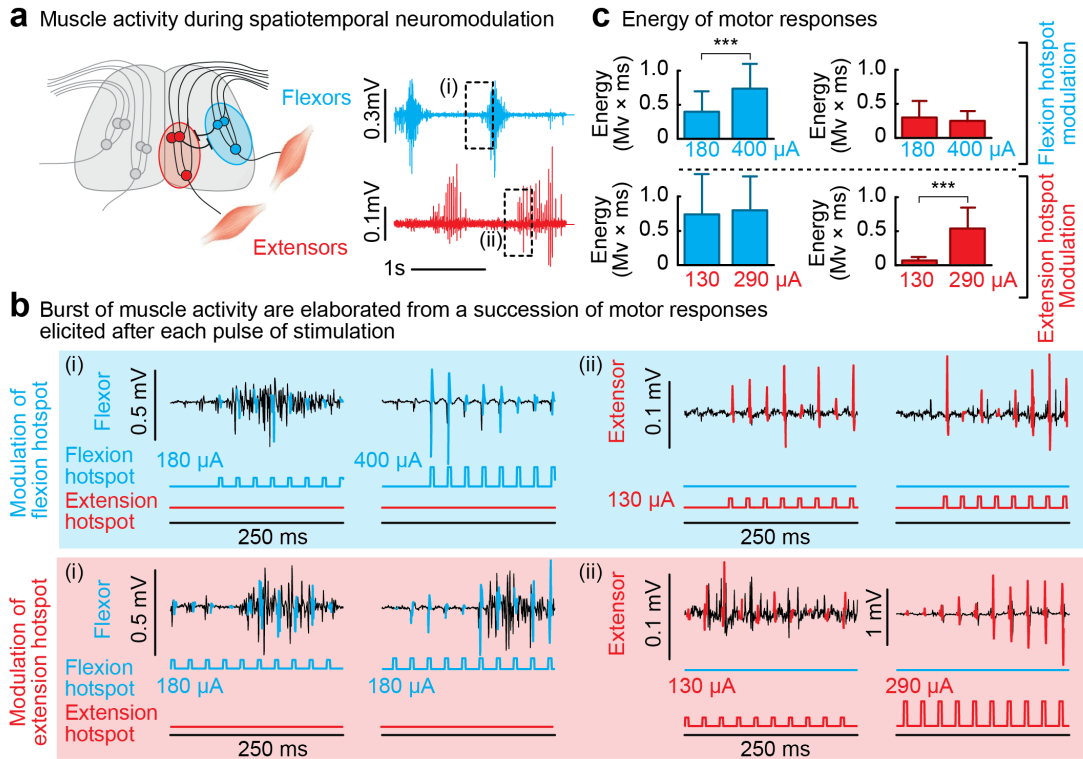

**Supplementary Figure 9: Modulation of motor responses during increase in stimulation amplitude**

(a) The diagram shows the proprioceptive feedback circuits that are thought to be recruited by epidural electrical stimulation. Electromyographic activity of flexor and extensor ankle muscles is shown for two successive steps performed under spatiotemporal neuromodulation. The dashed rectangles (i) and (ii) highlight the temporal window over which the muscle activity is displayed below. (b) Extensor and flexor muscle activity recorded with two levels of stimulation amplitudes for the electrode targeting the extensor versus flexor hotspot. Motor responses resulting from each stimulation pulse, indicated below each trace, are shown in color. (c) Histogram plots reporting the mean energy of motor responses in flexors and extensors muscles for the different experimental conditions. Energy was calculated as the square root of the second power of the signal, which was integrated over 2 ms. Bars show the median and 75% of the distribution. Non-parametric ANOVA statistical test was applied over 3000 responses. \*\*\*,  $P < 0.001$ .

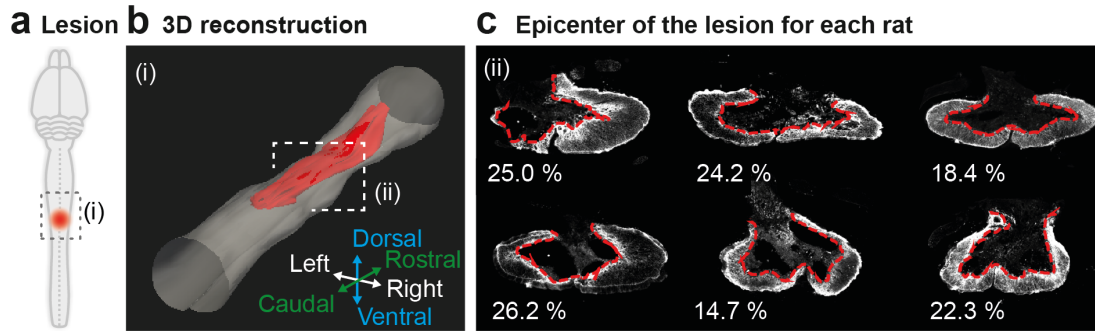

**Supplementary Figure 10: Quantification of spared tissue in rats with contusion SCI**

(a) Diagram illustrating the contusion SCI at the mid-thoracic level. (b) 3D reconstruction of a lesion cavity. (c) Photograph of coronal spinal cord sections taken at the lesion epicenter for each experimental rat. The tissues are stained against GFAP (reactive astrocyte) in order to delimitate the border between the lesioned and healthy tissues, shown with the red dashed lines. The calculated percent of tissue sparing is reported for each rat.

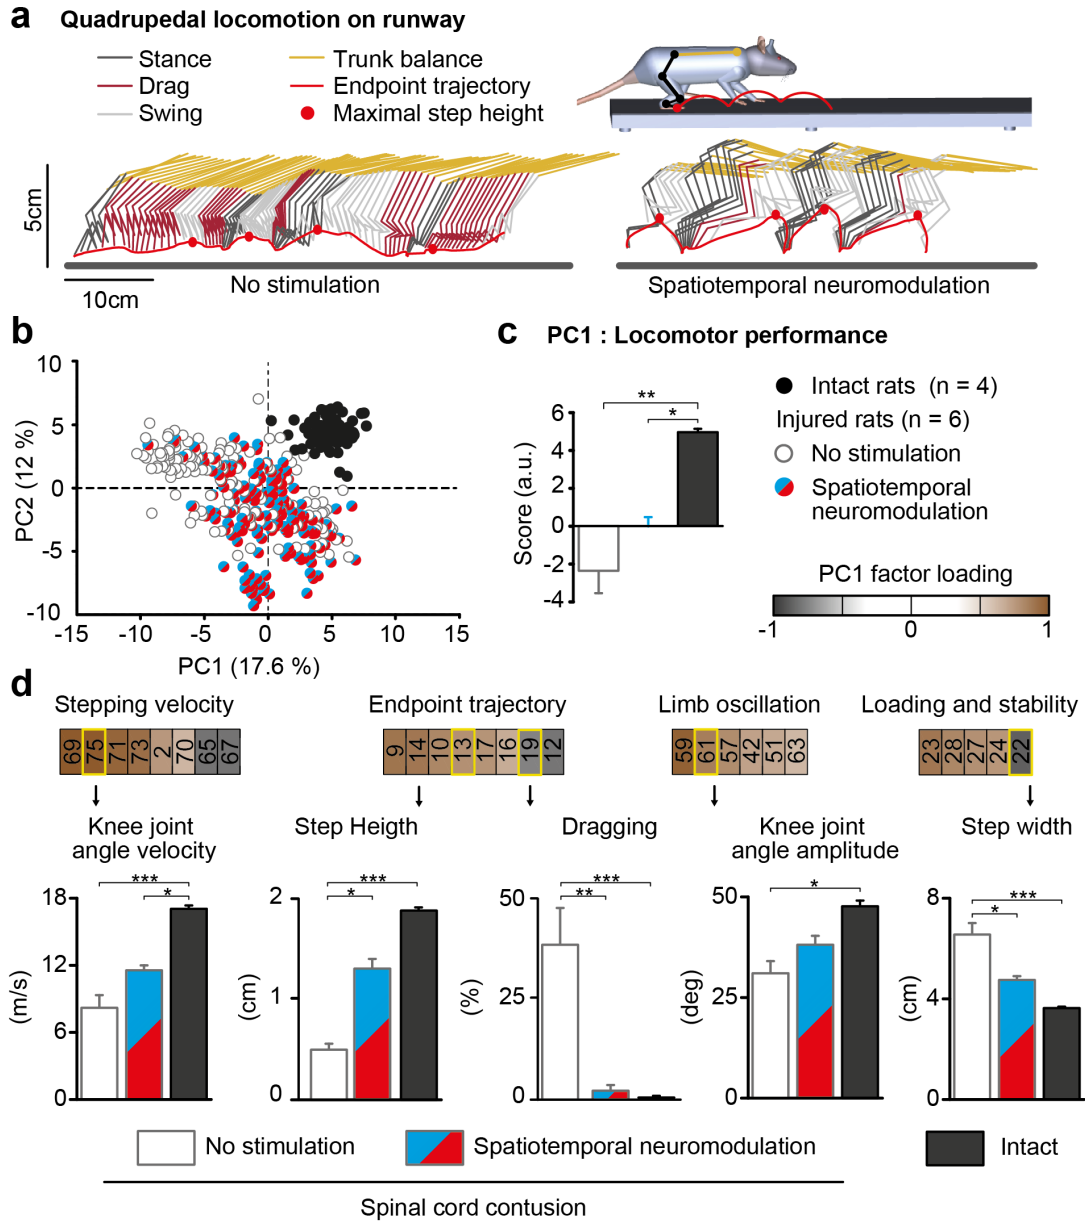

**Supplementary Figure 11: Quantification of locomotor performance during quadrupedal locomotion**

(a) Stick diagram decomposition of hindlimb and trunk movements together with hindlimb endpoint trajectory during quadrupedal locomotion without stimulation and under spatiotemporal neuromodulation. Rats were recorded 2 months after the contusion SCI, when recovery had plateaued. (b) A PC analysis was applied using same methods as those described in **Supplementary Fig. 8**, and displayed with the same convention as in this figure. Error bars, SEM. \*,  $P < 0.05$ ; \*\*,  $P < 0.01$ ; \*\*\*,  $P < 0.001$ .

**Supplementary Table 1: Computed kinematic, kinetic, and muscle activity parameters**

| PARAMETERS                                            | LABEL # | EXPLANATION OF PARAMETERS                                          |
|-------------------------------------------------------|---------|--------------------------------------------------------------------|
| <b>KINEMATIC VARIABLES</b>                            |         |                                                                    |
| <i>Temporal features</i>                              |         |                                                                    |
|                                                       | 1       | Cycle duration                                                     |
|                                                       | 2       | Cycle velocity                                                     |
|                                                       | 3       | Stance duration                                                    |
|                                                       | 4       | Swing duration                                                     |
|                                                       | 5       | Relative stance duration (percent of the cycle duration)           |
| <i>Limb endpoint (Metatarsal phalange) trajectory</i> |         |                                                                    |
|                                                       | 6       | Interlimb temporal coupling                                        |
|                                                       | 7       | Duration of double stance phase                                    |
|                                                       | 8       | Stride length                                                      |
|                                                       | 9       | Step length                                                        |
|                                                       | 10      | 3D limb endpoint path length                                       |
|                                                       | 11      | Maximum backward position                                          |
|                                                       | 12      | Minimum forward position                                           |
|                                                       | 13      | Step height                                                        |
|                                                       | 14      | Maximum speed during swing                                         |
|                                                       | 15      | Relative timing of maximum velocity during swing                   |
|                                                       | 16      | Acceleration at swing onset                                        |
|                                                       | 17      | Average endpoint velocity                                          |
|                                                       | 18      | Orientation of the velocity vector at swing onset                  |
|                                                       | 19      | Dragging                                                           |
|                                                       | 20      | Relative dragging duration (percent of swing duration)             |
| <i>Stability</i>                                      |         |                                                                    |
| <i>Base of support</i>                                | 21      | Positioning of the foot at stance onset with respect to the pelvis |
|                                                       | 22      | Stance width                                                       |
| <i>Trunk and pelvic position and oscillations</i>     | 23      | Maximum hip sagittal position                                      |
|                                                       | 24      | Minimum hip sagittal position                                      |
|                                                       | 25      | Amplitude of sagittal hip oscillations                             |
|                                                       | 26      | Variability of sagittal crest position                             |
|                                                       | 27      | Variability of sagittal crest velocity                             |
|                                                       | 28      | Variability of vertical hip movement                               |
|                                                       | 29      | Variability of sagittal hip movement                               |
|                                                       | 30      | Variability of the 3D hip oscillations                             |
|                                                       | 31      | Length of pelvis displacements in the forward direction            |
|                                                       | 32      | Length of pelvis displacements in the medio-lateral direction      |
|                                                       | 33      | Length of pelvis displacements in the vertical direction           |
|                                                       | 34      | Length of pelvis displacements in all directions                   |
| <i>Joint angles and segmental oscillations</i>        |         |                                                                    |
| <i>Backward</i>                                       | 35      | Crest oscillations                                                 |
|                                                       | 36      | Thigh oscillations                                                 |
|                                                       | 37      | Leg oscillations                                                   |
|                                                       | 38      | Foot oscillations                                                  |
|                                                       | 39      | Whole limb oscillations                                            |
| <i>Forward</i>                                        | 40      | Crest oscillations                                                 |
|                                                       | 41      | Thigh oscillations                                                 |
|                                                       | 42      | Leg oscillations                                                   |
|                                                       | 43      | Foot oscillations                                                  |
|                                                       | 44      | Whole limb oscillations                                            |
| <i>Flexion</i>                                        | 45      | Hip joint angle                                                    |
|                                                       | 46      | Knee joint angle                                                   |
|                                                       | 47      | Ankle joint angle                                                  |
| <i>Abduction</i>                                      | 48      | Whole limb abduction                                               |
|                                                       | 49      | Foot abduction                                                     |
| <i>Extension</i>                                      | 50      | Hip joint angle                                                    |
|                                                       | 51      | Knee joint angle                                                   |
|                                                       | 52      | Ankle joint angle                                                  |
| <i>Adduction</i>                                      | 53      | Whole limb adduction                                               |
|                                                       | 54      | Foot adduction                                                     |
| <i>Amplitude</i>                                      | 55      | Crest oscillations                                                 |

|                                     |     |                                                                                 |
|-------------------------------------|-----|---------------------------------------------------------------------------------|
|                                     | 56  | Thigh oscillations                                                              |
|                                     | 57  | Leg oscillations                                                                |
|                                     | 58  | Foot oscillations                                                               |
|                                     | 59  | Whole limb oscillations                                                         |
|                                     | 60  | Hip joint angle                                                                 |
|                                     | 61  | Knee joint angle                                                                |
|                                     | 62  | Ankle joint angle                                                               |
|                                     | 63  | Whole limb medio-lateral oscillations                                           |
|                                     | 64  | Foot abduction/adduction                                                        |
| <hr/>                               |     |                                                                                 |
| <b>Velocity</b>                     |     |                                                                                 |
| <hr/>                               |     |                                                                                 |
| <i>Minimum</i>                      | 65  | Whole limb oscillation velocity                                                 |
|                                     | 66  | Hip joint angle velocity                                                        |
|                                     | 67  | Knee joint angle velocity                                                       |
|                                     | 68  | Ankle joint angle velocity                                                      |
| <i>Maximum</i>                      | 69  | Whole limb oscillation velocity                                                 |
|                                     | 70  | Hip joint angle velocity                                                        |
|                                     | 71  | Knee joint angle velocity                                                       |
|                                     | 72  | Ankle joint angle velocity                                                      |
| <i>Amplitude</i>                    | 73  | Whole limb angle velocity                                                       |
|                                     | 74  | Hip joint angle velocity                                                        |
|                                     | 75  | Knee joint angle velocity                                                       |
|                                     | 76  | Ankle joint angle velocity                                                      |
| <hr/>                               |     |                                                                                 |
| <b>Inter-limb coordination</b>      |     |                                                                                 |
| <hr/>                               |     |                                                                                 |
| <i>PC analysis</i>                  | 77  | Degree of linear coupling between joint oscillations                            |
| <i>FFT</i>                          | 78  | Temporal coupling between crest and thigh oscillations                          |
| <i>decomposition</i>                | 79  | Temporal coupling between thigh and leg oscillations                            |
|                                     | 80  | Temporal coupling between leg and foot oscillations                             |
|                                     | 81  | Correlation between crest and thigh oscillations                                |
|                                     | 82  | Correlation between thigh and leg oscillations                                  |
|                                     | 83  | Correlation between leg and foot oscillations                                   |
| <i>Cross-correlation</i>            | 84  | Correlation between hip and knee oscillations                                   |
|                                     | 85  | Correlation between knee and ankle oscillations                                 |
|                                     | 86  | Correlation between ankle and MTP oscillations                                  |
|                                     | 87  | Temporal lag between backward positions of crest and thigh oscillations         |
|                                     | 88  | Temporal lag between forward positions of crest and thigh oscillations          |
| <i>Relative coupling</i>            | 89  | Temporal lag between backward positions of thigh and leg oscillations           |
|                                     | 90  | Temporal lag between forward positions of the thigh and leg oscillations        |
|                                     | 91  | Temporal lag between backward positions of leg and foot oscillations            |
|                                     | 92  | Temporal lag between forward positions of leg and foot oscillations             |
| <i>Inter-segmental coordination</i> | 93  | Lag of the cross correlation function between hindlimb oscillations             |
| <i>compared to</i>                  | 94  | Maximum R-value of the cross correlation function between hindlimb oscillations |
| <i>Able-bodied rats</i>             | 95  | Lag of the cross correlation function between hip oscillations                  |
|                                     | 96  | Maximum R-value of the cross correlation function between hip oscillations      |
|                                     | 97  | Lag of the cross correlation function between knee oscillations                 |
|                                     | 98  | Maximum R-value of the cross correlation function between knee oscillations     |
|                                     | 99  | Lag of the cross correlation function between ankle oscillations                |
|                                     | 100 | Maximum R-value of the cross correlation function between ankle oscillations    |
|                                     | 101 | Lag of the cross correlation function between endpoint oscillations             |
|                                     | 102 | Maximum R-value of the cross correlation function between endpoint oscillations |
|                                     | 103 | Phase of the first harmonic of the FFT of the hip elevation angle               |
|                                     | 104 | Amplitude of the first harmonic of the FFT of the hip elevation angle           |
|                                     | 105 | Phase of the first harmonic of the FFT of the knee elevation angle              |
|                                     | 106 | Amplitude of the first harmonic of the FFT of the knee elevation angle          |
|                                     | 107 | Phase of the first harmonic of the FFT of the ankle elevation angle             |
|                                     | 108 | Amplitude of the first harmonic of the FFT of the ankle elevation angle         |
| <i>Left-right</i>                   | 109 | Phase of the first harmonic of the FFT of the endpoint elevation angle          |
|                                     | 110 | Amplitude of the first harmonic of the FFT of the endpoint elevation angle      |
| <i>hindlimb</i>                     | 111 | Phase of the first harmonic of the FFT of the hindlimb elevation angle          |
|                                     | 112 | Amplitude of the first harmonic of the FFT of the hindlimb elevation angle      |

|                     |     |                                                                                     |
|---------------------|-----|-------------------------------------------------------------------------------------|
| <i>coordination</i> | 113 | Lag of the cross correlation function between crest and thigh limb elevation angles |
| <i>Hindlimb</i>     | 114 | Lag of the cross correlation function between thigh and hindlimb elevation angles   |
| <i>coordination</i> | 115 | Lag of the cross correlation function between hip and thigh elevation angles        |
|                     | 116 | Lag of the cross correlation function between hindlimb and foot elevation angles    |
|                     | 117 | Lag of the cross correlation function between thigh and ankle elevation angles      |
|                     | 118 | Lag of the cross correlation function between ankle and foot elevation angles       |

---

#### **KINETIC VARIABLES**

---

|  |     |                                                                         |
|--|-----|-------------------------------------------------------------------------|
|  | 119 | Mean amplitude of vertical forces (normalized to maximum value)         |
|  | 120 | Peak amplitude of vertical forces (normalized to maximum value)         |
|  | 121 | Peak to peak amplitude of vertical forces (normalized to maximum value) |
|  | 122 | value)                                                                  |
|  | 123 | Root mean square of vertical forces (normalized to maximum value)       |
|  |     | Integral of vertical forces (normalized to maximum value)               |
|  | 124 | Weight-bearing level                                                    |

---

#### **MUSCLE ACTIVITY VARIABLES**

---

##### Timing (relative to cycle duration, paw contact to paw contact)

|                 |     |                                                              |
|-----------------|-----|--------------------------------------------------------------|
| <i>Extensor</i> | 125 | Relative onset of ipsilateral extensor muscle activity burst |
|                 | 126 | Relative end of ipsilateral extensor muscle activity burst   |
| <i>Flexor</i>   | 127 | Relative onset of ipsilateral flexor muscle activity burst   |
|                 | 128 | Relative end of ipsilateral flexor muscle activity burst     |

##### Duration

|                 |     |                                                        |
|-----------------|-----|--------------------------------------------------------|
| <i>Extensor</i> | 129 | Duration of ipsilateral extensor muscle activity burst |
| <i>Flexor</i>   | 130 | Duration of ipsilateral flexor muscle activity burst   |

##### Amplitude

|                            |     |                                                                |
|----------------------------|-----|----------------------------------------------------------------|
| <i>Extensor</i>            | 131 | Mean amplitude of ipsilateral muscle activity burst            |
|                            | 132 | Integral of ipsilateral extensor muscle activity burst         |
|                            | 133 | Root mean square of ipsilateral extensor muscle activity burst |
| <i>Flexor</i>              | 134 | Mean amplitude of ipsilateral flexor muscle activity burst     |
|                            | 135 | Integral of ipsilateral flexor muscle activity burst           |
|                            | 136 | Root mean square of ipsilateral flexor muscle activity burst   |
| <i>Muscle coactivation</i> | 137 | Co-contraction of flexor and extensor muscle                   |

---

**Supplementary Table 2: Detailed information on sample descriptions and statistics**

|           | Description                                         | Sample                                                                                                                                                                                                                                   | Methods        | Statistics   |          |
|-----------|-----------------------------------------------------|------------------------------------------------------------------------------------------------------------------------------------------------------------------------------------------------------------------------------------------|----------------|--------------|----------|
|           |                                                     | size                                                                                                                                                                                                                                     |                | Reported     | P-values |
| Figure 2c | Vertical displacement of the leg in acute condition | flexor hotspot(A) = 4 targeted leg movements / 6 rats<br>flexor hotspot(B) = 4 untargeted leg movements / 6 rats<br>Extensor hotspot(C) = 4 targeted leg movements / 6 rats<br>Extensor hotspot(D) = 4 untargeted leg movements / 6 rats | One-Way ANOVA  | mean +/- SEM | 1.72E-07 |
| Figure 4c | Peak amplitude of vertical forces                   | Midline continuous neuromodulation (A) = 10 steps / 5 rats<br>Lateral continuous neuromodulation (B) = 10 steps / 5 rats<br>Spatiotemporal neuromodulation (C) = 10 steps / 5 rats<br>Intact rat(D) = 10 steps / 3 rats                  | Kruskal Wallis | mean +/- SEM | 0.00328  |
| Figure 4c | Peak velocity during swing                          | Midline continuous neuromodulation (A) = 10 steps / 5 rats<br>Lateral continuous neuromodulation (B) = 10 steps / 5 rats<br>Spatiotemporal neuromodulation (C) = 10 steps / 5 rats<br>Intact rat(D) = 10 steps / 3 rats                  | Kruskal Wallis | mean +/- SEM | 0.0042   |
| Figure 5b | Ground reaction force during stance                 | Extensor amplitude 1.2 = 10 steps / 5 rats<br>Extensor amplitude 1.6 = 10 steps / 5 rats<br>Extensor amplitude 2.1 = 10 steps / 5 rats<br>Extensor amplitude 2.5 = 10 steps / 5 rats                                                     | One-Way ANOVA  | mean +/- SEM | 0.007    |
| Figure 5b | Normalized Step height during swing                 | Flexor amplitude 1.2 = 10 steps / 5 rats<br>Flexor amplitude 1.6 = 10 steps / 5 rats<br>Flexor amplitude 2.1 = 10 steps / 5 rats<br>Flexor amplitude 2.5 = 10 steps / 5 rats                                                             | One-Way ANOVA  | mean +/- SEM | 0.0316   |
| Figure 6c | Maximum weight bearing                              | Continuous neuromodulation = 6 rats<br>Spatiotemporal neuromodulation = 6 rats                                                                                                                                                           | Paired t-test  | mean +/- SEM | 0.0012   |
| Figure 6c | Peak force at foot strike                           | Continuous neuromodulation = 10 steps / 6 rats<br>Spatiotemporal neuromodulation = 10 steps / 6 rats                                                                                                                                     | Paired t-test  | mean +/- SEM | 0.0246   |
| Figure 6c | Amplitude of extensor muscle                        | Continuous neuromodulation = 10 steps / 6 rats<br>Spatiotemporal neuromodulation = 10 steps / 6 rats                                                                                                                                     | Paired t-test  | mean +/- SEM | 0.0156   |
| Figure 6d | Time until collapse on treadmill                    | Continuous neuromodulation = 6 rats<br>Spatiotemporal neuromodulation = 6 rats                                                                                                                                                           | Paired t-test  | mean +/- SEM | 0.0095   |
| Figure 6e | Trunk Index                                         | No neuromodulation = 10 steps / 6 rats<br>Spatiotemporal neuromodulation = 10 steps / 6 rats                                                                                                                                             | Paired t-test  | mean +/- SEM | 0.0011   |
| Figure 6f | Staircase success rate                              | No neuromodulation = 12 step / 6 rats<br>Spatiotemporal neuromodulation = 12 step / 6 rats                                                                                                                                               | Paired t-test  | mean +/- SEM | 0.008    |
